# Supplementary material
Source: PubMed Central journal article supplement (PMC3856949)

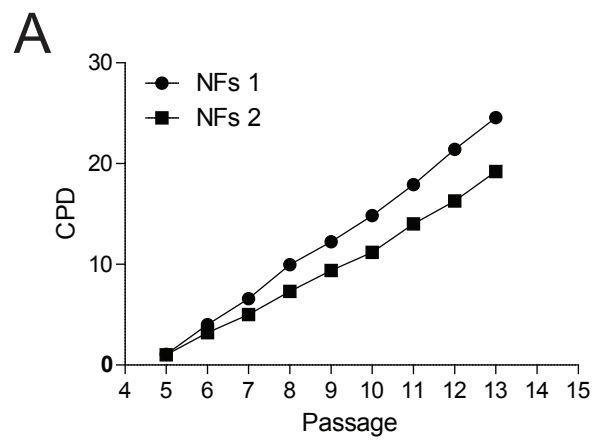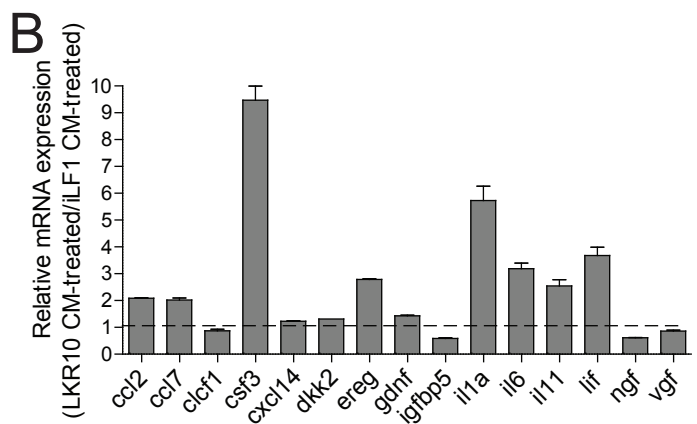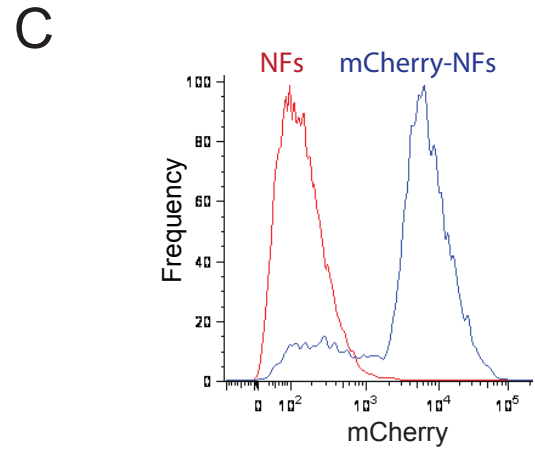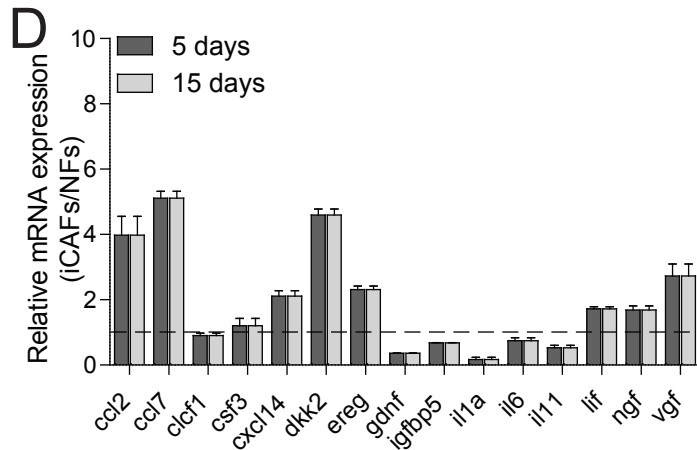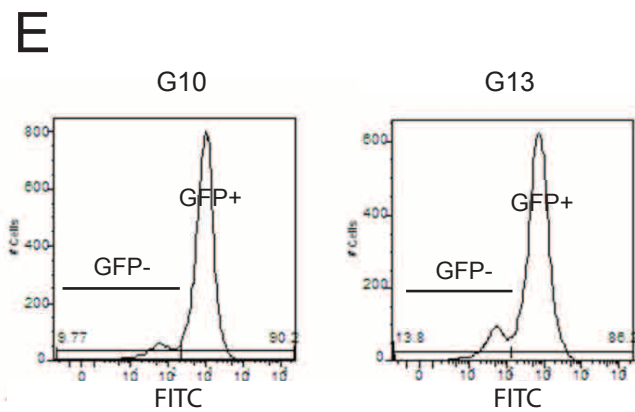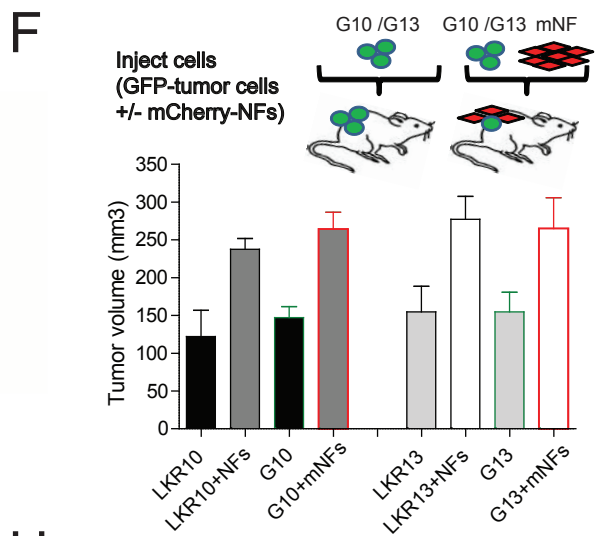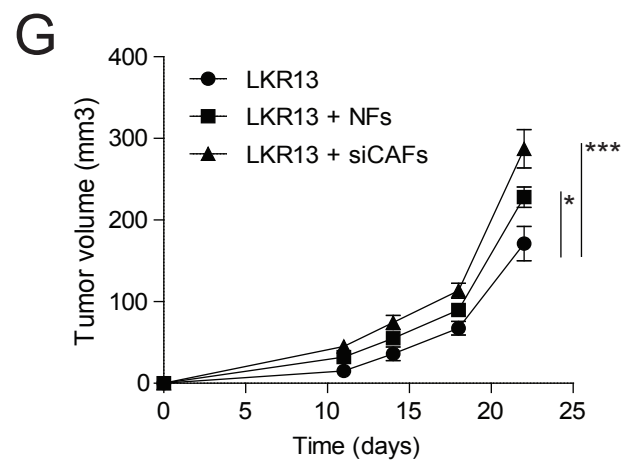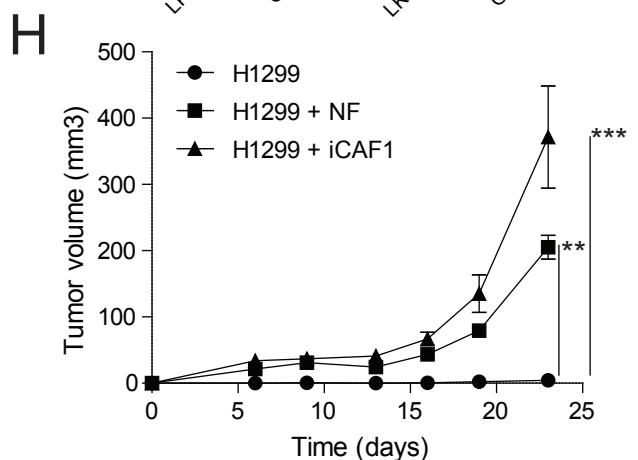

Supplement: NIHMS405899-supplement-10.pdf [file NIHMS405899-supplement-10.pdf]

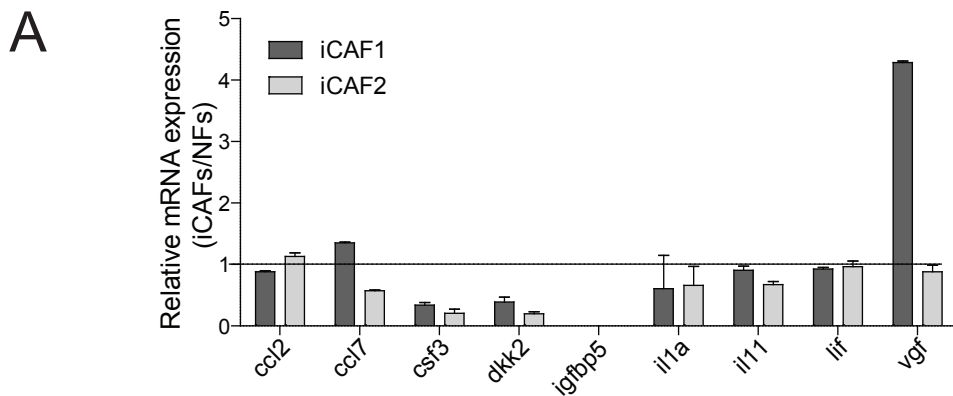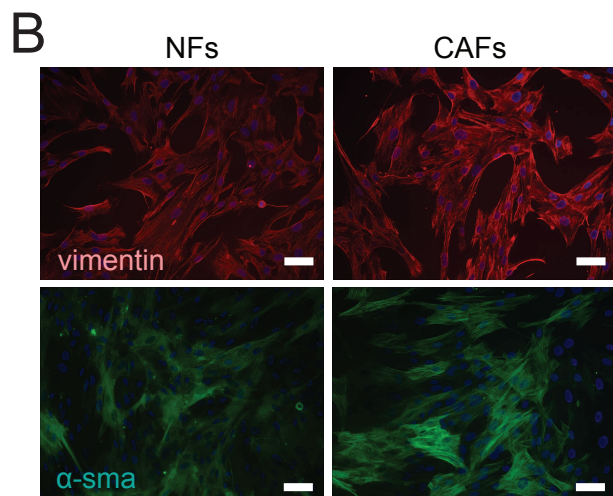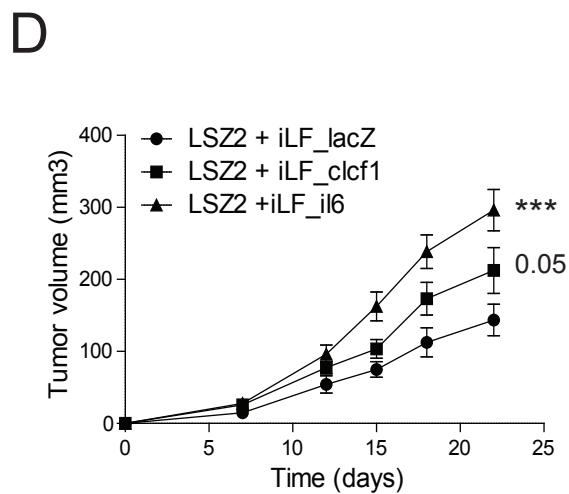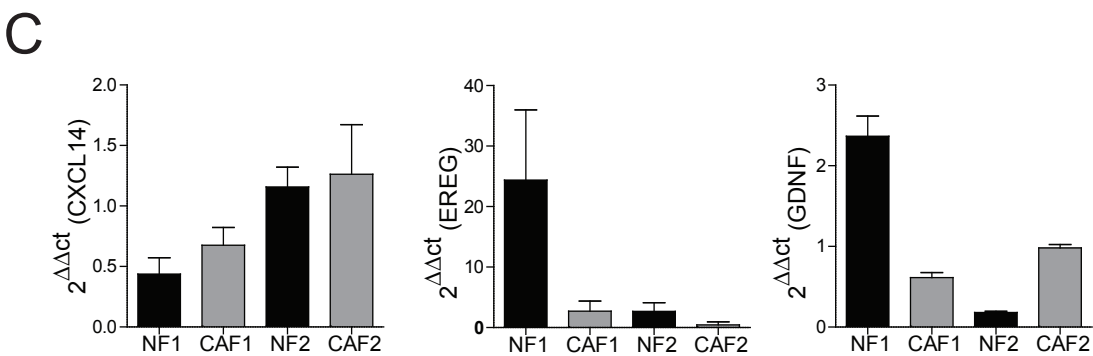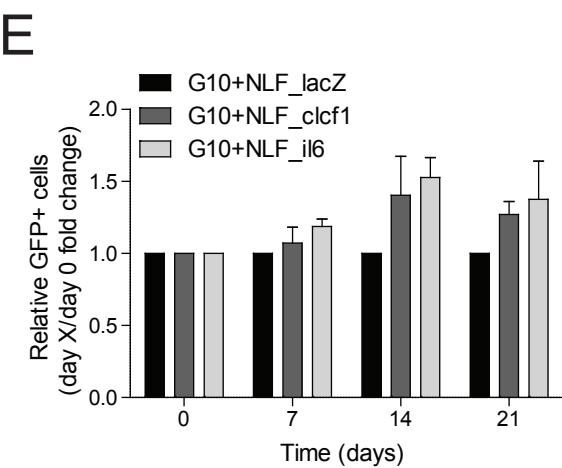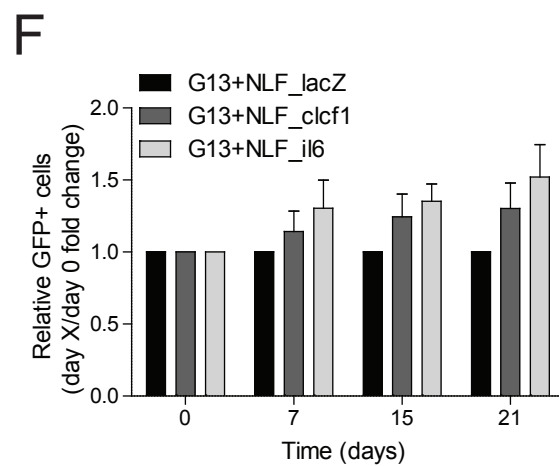

Supplement: NIHMS405899-supplement-11.pdf [file NIHMS405899-supplement-11.pdf]

**A**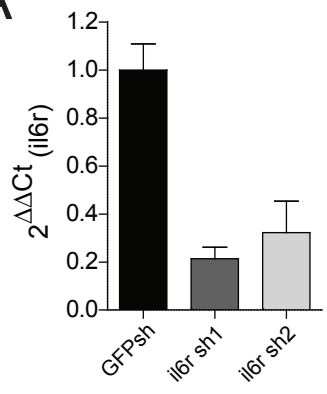**B**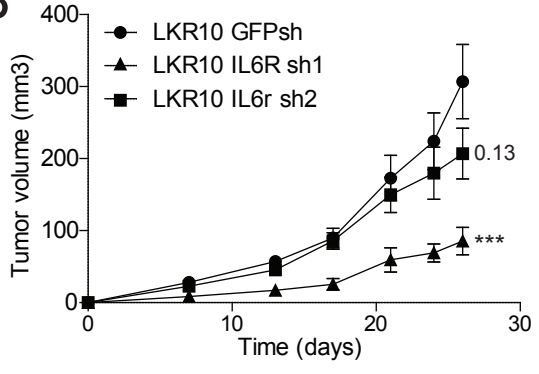**C**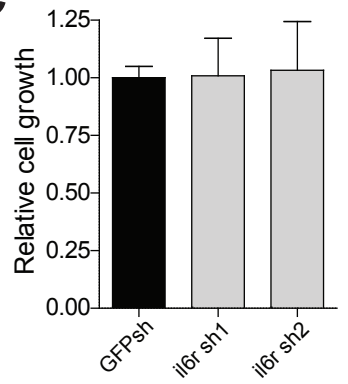

Supplement: NIHMS405899-supplement-12.pdf [file NIHMS405899-supplement-12.pdf]

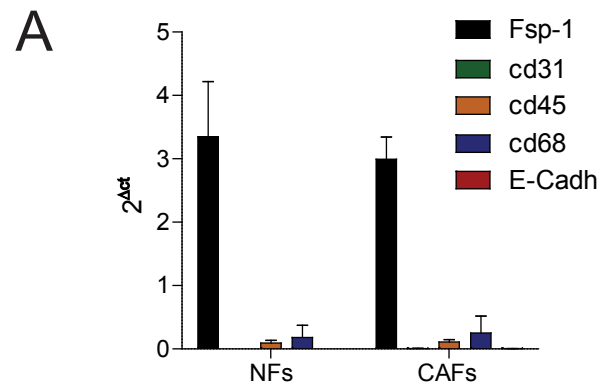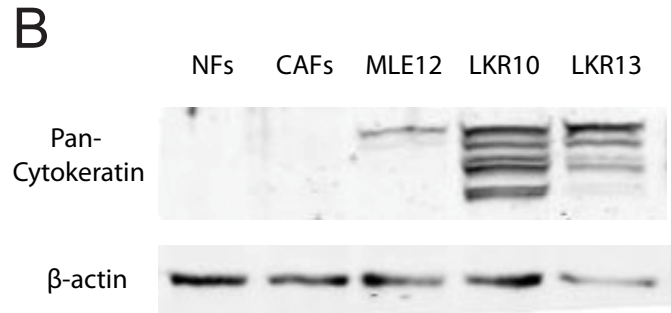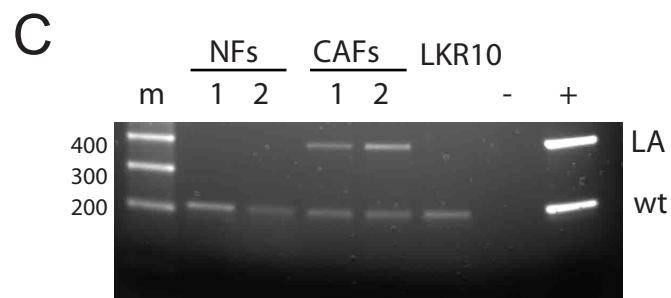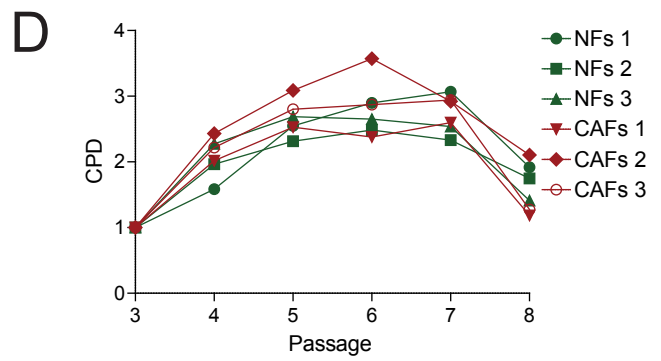

Supplement: NIHMS405899-supplement-7.pdf [file NIHMS405899-supplement-7.pdf]

A

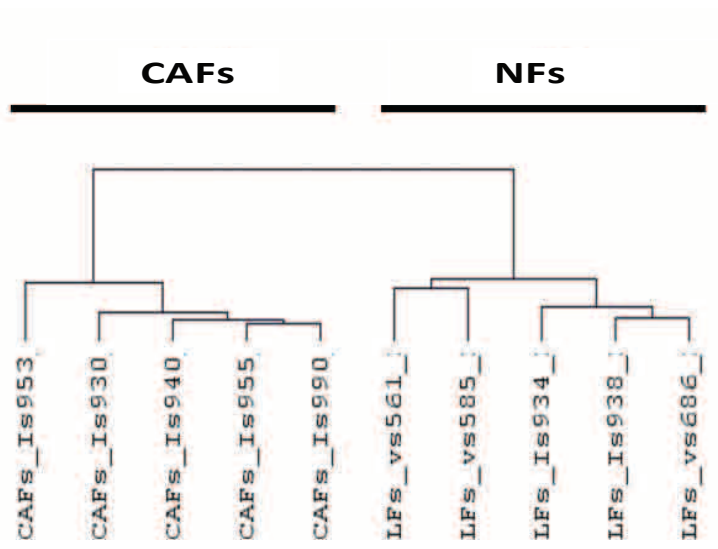

B

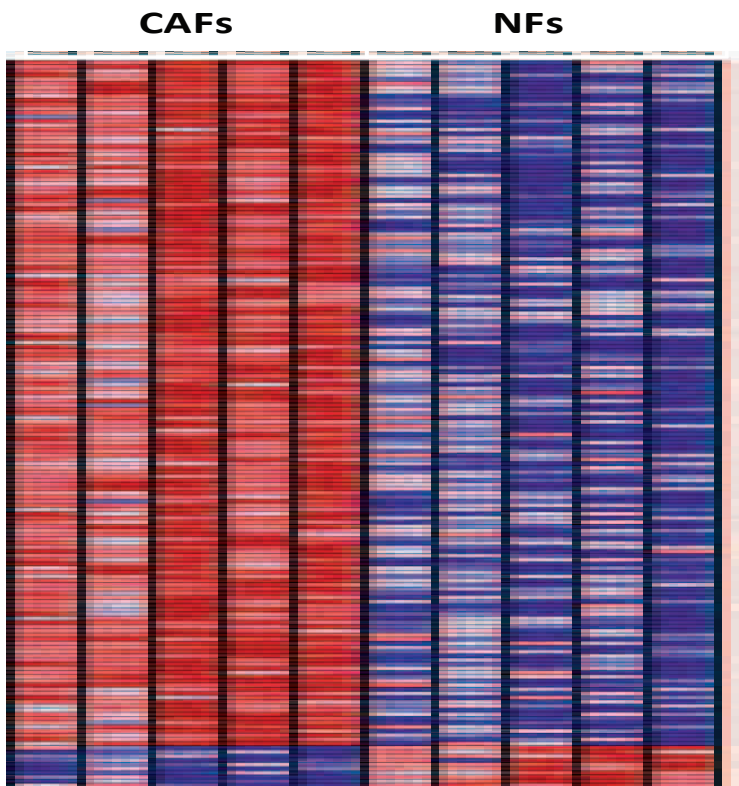

Supplement: NIHMS405899-supplement-8.pdf [file NIHMS405899-supplement-8.pdf]

**A**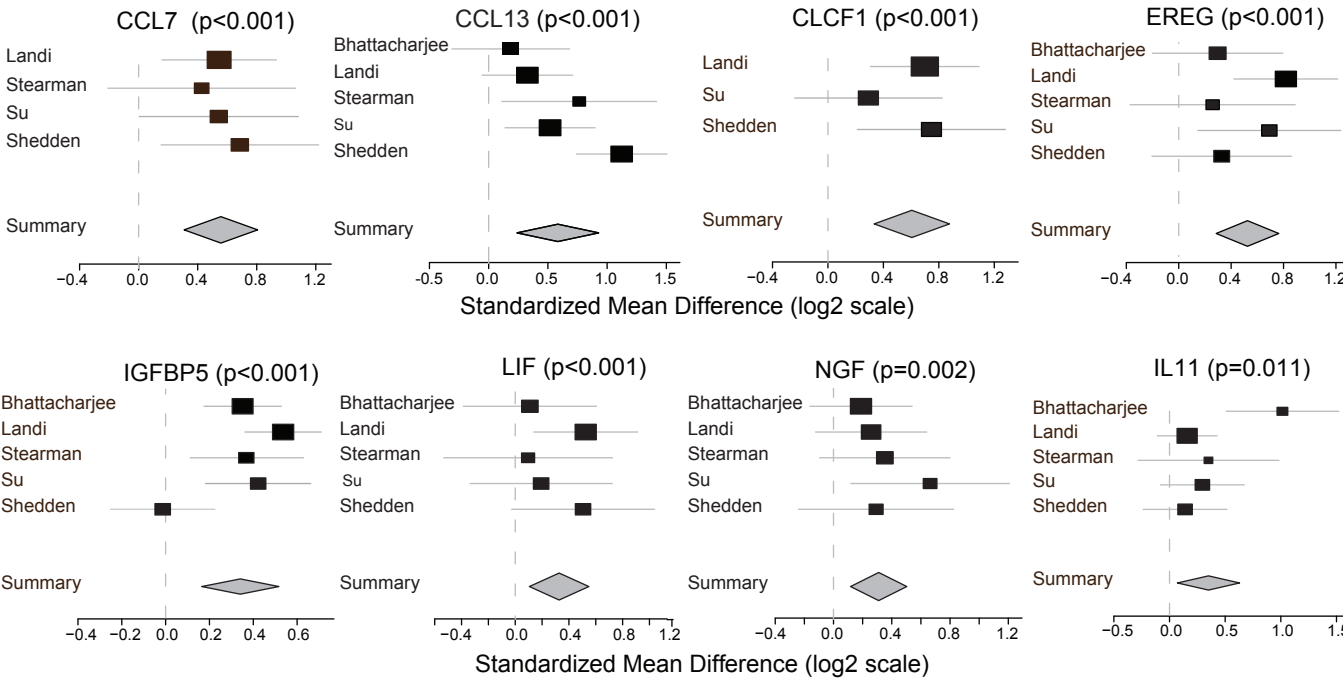

Supplement: NIHMS405899-supplement-9.pdf [file NIHMS405899-supplement-9.pdf]
